# Supplementary material for: The Sclerotinia sclerotiorum ADP-Ribosylation Factor 6 Plays an Essential Role in Abiotic Stress Response and Fungal Virulence to Host Plants
Source: MDPI journal article supplement (doi:10.3390/jof10010012), 2023-12-25
Supplement: s1 [file s1]

# Supplementary Information: The *Sclerotinia sclerotiorum* ADP-Ribosylation Factor 6 Plays an Essential Role in Abiotic Stress Response and Fungal Virulence to Host Plants

Kunmei Wang, Siyi Wang, Ting Wang, Qi Xia and Shitou Xia \*

Hunan Provincial Key Laboratory of Phytohormones and Growth Development, College of Bioscience and Biotechnology, Hunan Agricultural University, Changsha 410128, China; yuhunan@stu.hunau.edu.cn (K.W.); wangsiyi@stu.hunau.edu.cn (S.W.); tina@stu.hunau.edu.cn (T.W.)

\* Correspondence: xstone0505@hunau.edu.cn

**Citation:** Wang, K.; Wang, S.; Wang, T.; Xia, Q.; Xia, S. The *Sclerotinia sclerotiorum* ADP-Ribosylation Factor 6 Plays an Essential Role in Abiotic Stress Response and Fungal Virulence to Host Plants. *J. Fungi* **2024**, *10*, 12. <https://doi.org/10.3390/jof10010012>

Academic Editors: Zonghua Wang and Jun Huang

Received: 16 November 2023

Revised: 21 December 2023

Accepted: 22 December 2023

Published: 25 December 2023

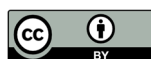

**Copyright:** © 2023 by the authors. Licensee MDPI, Basel, Switzerland. This article is an open access article distributed under the terms and conditions of the Creative Commons Attribution (CC BY) license (<https://creativecommons.org/licenses/by/4.0/>).

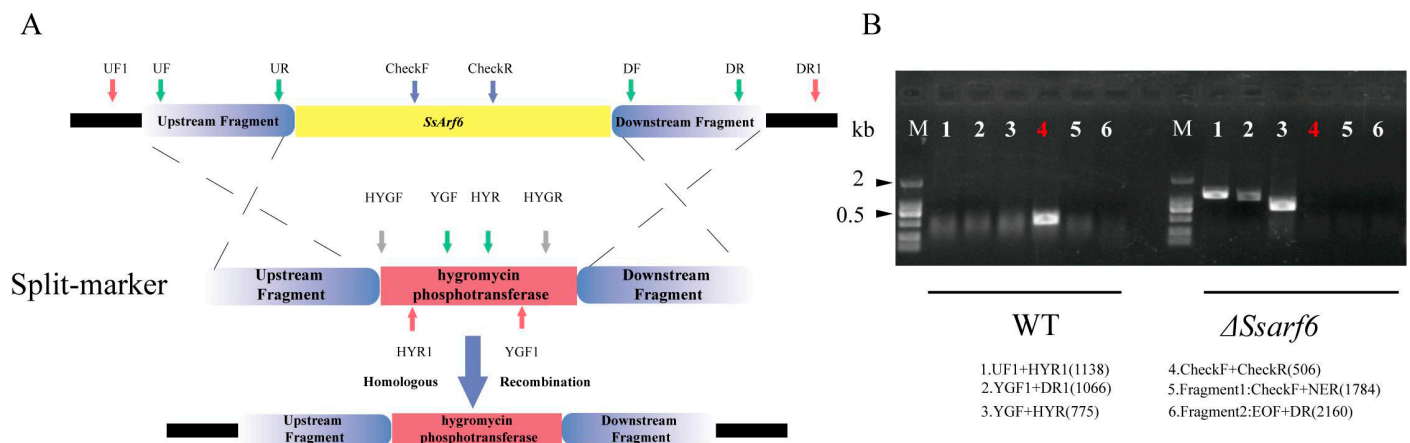

**Figure S1.** Knockout of *SsArf6* in *S. sclerotiorum*. **(A)** The schematic diagram of the strategy used for knockout of *SsArf6*. The *SsArf6* gene, Hygromycin phosphotransferase gene (*hph*), and G418 resistance gene *NEO* were denoted by yellow, red, and green rectangles, respectively. The labeled primers in the diagram were used for amplifying flanking sequences of *SsArf6* or facilitating mutant screening. **(B)** The verification of knockout of *SsArf6* by PCR. Genomic DNA obtained from WT, knockout mutant  $\Delta Ssarf6$  were utilized as templates for PCR. A total of six primer pairs were employed to detect the insertion of *hph* and its upstream and downstream fragments, as well as to confirm the knockout of *SsArf6*. The sizes of the amplified bands were indicated within brackets. The lanes labeled as M represent the DNA marker.

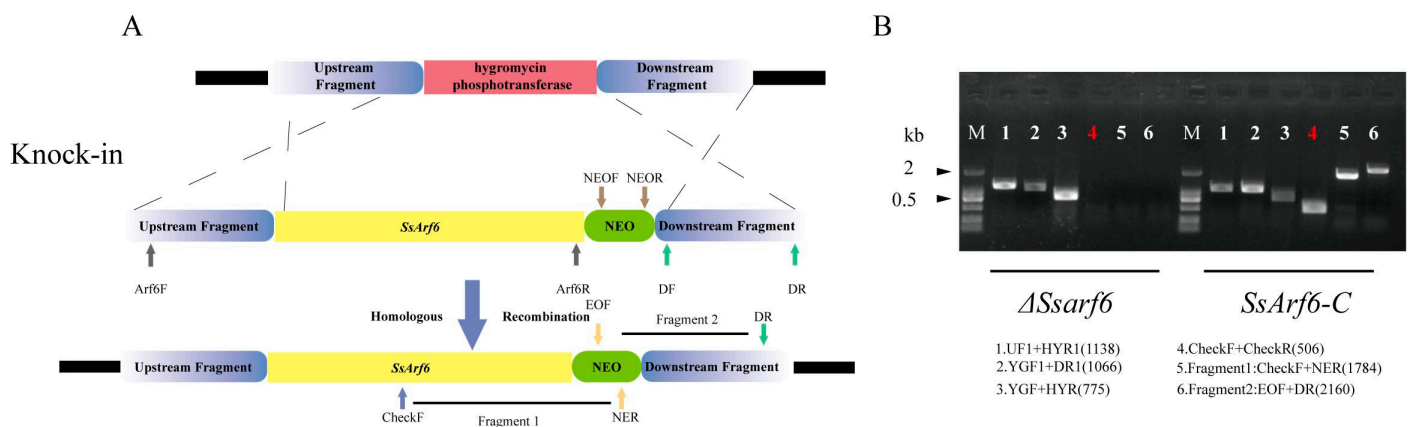

**Figure S2.** Complementation of *SsArf6* in  $\Delta Ssarf6$  mutants of *S. sclerotiorum*. **(A)** The schematic diagram of the strategy used for the complementation of  $\Delta Ssarf6$ . The *SsArf6* gene, Hygromycin phosphotransferase gene (*hph*), and G418 resistance gene *NEO* were denoted by yellow, red, and green rectangles, respectively. The labeled primers in the diagram were used for amplifying full-length genomic DNA of *SsArf6* or facilitating transformant screening. **(B)** The verification of complementation of *SsArf6* by PCR. Genomic DNA obtained from the deletion mutant  $\Delta Ssarf6$ , and complemented mutant *SsArf6-C* were utilized as templates for PCR. A total of six primer pairs were employed to confirm the complementation of *SsArf6*. The sizes of the amplified bands were indicated within brackets. The lanes labeled as M represent the DNA marker.

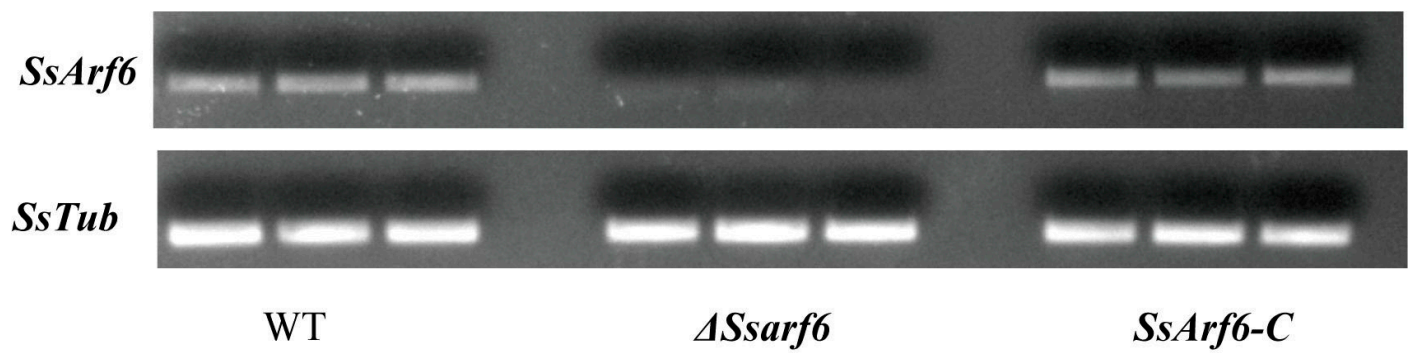

**Figure S3.** The semi-quantitative RT-PCR analysis of the WT,  $\Delta Ssarf6$  and *SsArf6-C* strains. Semi-quantitative RT-PCR was performed using cDNA templates from WT,  $\Delta Ssarf6$  and *SsArf6-C* for 28 cycles. *SsTub* ( $\beta$ -tubulin) was used as an internal reference.

Table S1. Primers used in study

| Primer name | Primer sequence                            | Primer function                                                                                                                                                              |
|-------------|--------------------------------------------|------------------------------------------------------------------------------------------------------------------------------------------------------------------------------|
| UF          | GACAATCCGAGCACTCAA                         | Amplification of upstream sequence of <i>SsArf6</i> . The red part presents homologous sequences from HY fragment using for homologous recombination.                        |
| UR          | GTGCTCCTTCAATATCATCTTCTGT                  |                                                                                                                                                                              |
| DF          | AGGTACACTTGTTTAGAGGTAATCC                  | Amplification of upstream sequence of <i>SsArf6</i> . The red part presents homologous sequences from YG fragment using for homologous recombination.                        |
| DR          | GGAATTGGAAAATGGGGT                         |                                                                                                                                                                              |
| HYGF        | ACAGAAGATGATATTGAAGGAGCAC                  | Amplification of HY and YG fragment                                                                                                                                          |
| HYR         | GCATCATCGAAATTGCCGTCAACC                   |                                                                                                                                                                              |
| YGF         | TCTCGGAGGGCGAAGAATCTCGTGC                  |                                                                                                                                                                              |
| HYGR        | GGATTACCTCTAAACAAGTGACCT                   | Check if the position of homologous substitution is correct                                                                                                                  |
| UF1         | GACTCTTACCTCGCAATGAA                       |                                                                                                                                                                              |
| HYR1        | CGTTCCTGTCTGCTAATAAG                       |                                                                                                                                                                              |
| YGF1        | TAGTGAATGCTCCGTAACA                        |                                                                                                                                                                              |
| DR1         | CTCGGTCATTGATTGTGTATAG                     |                                                                                                                                                                              |
| Arf6F       | GACTCTTACCTCGCAATGAA                       | Amplification of upstream and full-length sequences of <i>SsArf6</i> .The lowercase part presents homologous sequences from NEO fragment using for homologous recombination. |
| Arf6R       | agtgtccttcaatatcatcttctgCTTTGCTTGTGGAGCAGG |                                                                                                                                                                              |
| NEOF        | CAGAAGATGATATTGAAGGAGCAC                   | Amplification of NEO sequence of G418 resistance gene                                                                                                                        |
| NEOR        | GGATTACCTCTAAACAAGTGACCT                   |                                                                                                                                                                              |
| checkF      | GTAGAGACGGTGACATATAAGA                     | Knockout transformants identification                                                                                                                                        |
| checkR      | CATACCAATCCTTCCATTAACC                     |                                                                                                                                                                              |
| checkF      | GTAGAGACGGTGACATATAAGA                     | Complementation transformants identification                                                                                                                                 |
| NER         | CGTCAAGAAGGCGATAGAA                        |                                                                                                                                                                              |
| EOF         | TCTCCTGTATCTCACCTT                         |                                                                                                                                                                              |
| DR          | GGAATTGGAAAATGGGGT                         | Amplification of reference gene                                                                                                                                              |
| SsTubqF     | ACCTCCATCCAAGAACTC                         |                                                                                                                                                                              |
| SsTubqR     | GAAGTCCATCTCGTCCAT                         |                                                                                                                                                                              |
